# Supplementary material for: Accurate Detection of Convergent Amino-Acid Evolution with PCOC
Source: PubMed Central journal article supplement — Mol Biol Evol. 2018 Jul 7;35(9):2296–306. doi: 10.1093/molbev/msy114 (PMC6106957; doi:10.1093/molbev/msy114), 2018-07-07
Supplement: msy114_supp.pdf [file msy114_supp.pdf]

The supplementary material file was too big to fit on MBE's website but is available on biorxiv and can be obtained by following the link below:

<https://www.biorxiv.org/content/biorxiv/suppl/2018/04/20/247296.DC2/247296-1.pdf>
